# Supplementary material for: Preparation of Chitosan/Calcium Alginate/Bentonite Composite Hydrogel and Its Heavy Metal Ions Adsorption Properties
Source: MDPI journal article supplement (doi:10.3390/polym13111891), 2021-06-07
Supplement: s1 [file s1]

# Supplementary Information

## Preparation of Chitosan/Calcium Alginate/Bentonite Composite hydrogel and its heavy metal ions adsorption properties

Zongkun Lin <sup>†</sup>, Yuru Yang <sup>†</sup>, Zizhan Liang, Lei Zeng and Aiping Zhang <sup>\*</sup>

College of Forestry and Landscape Architecture, South China Agricultural University, Guangzhou 510642, PR China; linzongkun@qq.com(Z.Lin); 3247315952@qq.com(Y.Yang);

<sup>\*</sup> Correspondence: aiping@scau.edu.cn; Tel.: +86-159-1311-8266

<sup>†</sup> Co-first author, these authors contributed equally to this work.

**Table S1.** Orthogonal experiment of composite hydrogel's adsorption performance

| Number of Hydrogels |           | <i>A</i>           | <i>B</i>              | <i>C</i>                   | $Q_{Pb^{2+}}$ | $Q_{Cu^{2+}}$ | $Q_{Cd^{2+}}$ |
|---------------------|-----------|--------------------|-----------------------|----------------------------|---------------|---------------|---------------|
|                     |           | $m_{CTS} : m_{SA}$ | $m_{CaCO_3} : m_{SA}$ | Mass fraction of BT (wt.%) |               |               |               |
| 1                   |           | a (1 : 7)          | a (1 : 1)             | a (2)                      | 335.36        | 115.30        | 102.38        |
| 2                   |           | a                  | b (2 : 1)             | b (4)                      | 268.64        | 91.68         | 82.45         |
| 3                   |           | a                  | c (3 : 1)             | c (6)                      | 286.16        | 75.89         | 74.05         |
| 4                   |           | a                  | d (4 : 1)             | d (8)                      | 434.89        | 73.62         | 48.2          |
| 5                   |           | b (2 : 6)          | a                     | b                          | 212.77        | 62.68         | 40.35         |
| 6                   |           | b                  | b                     | a                          | 389.03        | 94.93         | 72.55         |
| 7                   |           | b                  | c                     | d                          | 201.04        | 69.63         | 55.78         |
| 8                   |           | b                  | d                     | c                          | 395.04        | 71.21         | 49.63         |
| 9                   |           | c (3 : 5)          | a                     | c                          | 269.01        | 72.53         | 38.33         |
| 10                  |           | c                  | b                     | d                          | 70.24         | 64.94         | 35.15         |
| 11                  |           | c                  | c                     | a                          | 362.42        | 91.41         | 46.87         |
| 12                  |           | c                  | d                     | b                          | 113.09        | 61.48         | 55.88         |
| 13                  |           | d (4 : 4)          | a                     | d                          | 39.70         | 84.41         | 5.32          |
| 14                  |           | d                  | b                     | c                          | 30.32         | 60.37         | 34.41         |
| 15                  |           | d                  | c                     | b                          | 47.73         | 70.09         | 5.13          |
| 16                  |           | d                  | d                     | a                          | 340.05        | 85.71         | 18.25         |
| $\bar{K}_a$         | $Pb^{2+}$ | 331.26             | 232.56                | 356.72                     |               |               |               |
|                     | $Cu^{2+}$ | 89.12              | 83.73                 | 96.84                      |               |               |               |
|                     | $Cd^{2+}$ | 76.77              | 46.60                 | 60.01                      |               |               |               |
| $\bar{K}_b$         | $Pb^{2+}$ | 299.47             | 189.56                | 160.56                     |               |               |               |
|                     | $Cu^{2+}$ | 74.61              | 77.98                 | 71.48                      |               |               |               |
|                     | $Cd^{2+}$ | 54.58              | 56.14                 | 45.95                      |               |               |               |
| $\bar{K}_c$         | $Pb^{2+}$ | 203.69             | 224.34                | 245.13                     |               |               |               |
|                     | $Cu^{2+}$ | 72.59              | 76.76                 | 70.00                      |               |               |               |
|                     | $Cd^{2+}$ | 44.06              | 45.46                 | 49.11                      |               |               |               |
| $\bar{K}_d$         | $Pb^{2+}$ | 114.45             | 320.77                | 186.47                     |               |               |               |
|                     | $Cu^{2+}$ | 75.15              | 73.01                 | 73.15                      |               |               |               |
|                     | $Cd^{2+}$ | 15.78              | 42.99                 | 36.11                      |               |               |               |
| R                   | $Pb^{2+}$ | 216.81             | 131.21                | 196.16                     |               |               |               |
|                     | $Cu^{2+}$ | 16.53              | 10.73                 | 26.84                      |               |               |               |
|                     | $Cd^{2+}$ | 60.99              | 13.15                 | 23.90                      |               |               |               |

|                  |                                              |       |           |
|------------------|----------------------------------------------|-------|-----------|
| Influence degree | A>C><br>B                                    | C>A>B | A>C<br>>B |
| Optimization     | A <sub>1</sub> C <sub>1</sub> B <sub>1</sub> |       |           |

**Table S2.** Adsorption Kinetics Parameters

| Models                            | Parameters       | Values                |                       |                       |
|-----------------------------------|------------------|-----------------------|-----------------------|-----------------------|
|                                   |                  | Pb <sup>2+</sup>      | Cu <sup>2+</sup>      | Cd <sup>2+</sup>      |
| Pseudo-first-order<br>Model       | K <sub>1</sub>   | 0.00541               | 0.00863               | 0.0081                |
|                                   | q <sub>e,1</sub> | 503.539               | 109.392               | 102.093               |
|                                   | R <sup>2</sup>   | 0.984                 | 0.956                 | 0.901                 |
|                                   | RMSE             | 23.14                 | 7.921                 | 10.756                |
|                                   | χ <sup>2</sup>   | 25.156                | 8.611                 | 11.694                |
| Pseudo-second-order<br>Model      | K <sub>2</sub>   | 9.06×10 <sup>-6</sup> | 8.76×10 <sup>-5</sup> | 1.12×10 <sup>-4</sup> |
|                                   | q <sub>e,2</sub> | 629.566               | 124.417               | 113.503               |
|                                   | R <sup>2</sup>   | 0.97425               | 0.98                  | 0.941                 |
|                                   | RMSE             | 30.207                | 5.261                 | 8.281                 |
|                                   | χ <sup>2</sup>   | 32.838                | 6.14                  | 9                     |
| Elovich Model                     | α                | 5.641                 | 2.82525               | 3.560                 |
|                                   | β                | 0.007                 | 0.04                  | 0.0468                |
|                                   | R <sup>2</sup>   | 0.932                 | 0.984                 | 0.966                 |
|                                   | RMSE             | 47.612                | 4.74                  | 6.249                 |
|                                   | χ <sup>2</sup>   | 51.76                 | 5.153                 | 6.794                 |
| Intra-particle Diffusion<br>Model | K <sub>d,1</sub> | 26.27                 | 4.069                 | 11.317                |
|                                   | C <sub>1</sub>   | -56.36                | -1.859                | -11.781               |
|                                   | R <sup>2</sup>   | 0.9324                | 1                     | 0.903                 |
|                                   | K <sub>d,2</sub> | 16.466                | 5.069                 | 3.212                 |
|                                   | C <sub>2</sub>   | -8.484                | 7.422                 | 22.9                  |
|                                   | R <sup>2</sup>   | 0.972                 | 0.967                 | 0.959                 |
|                                   | K <sub>d,3</sub> | 0.979                 | 0.845                 | 0.556                 |
|                                   | C <sub>3</sub>   | 484.535               | 87.495                | 89.46                 |
|                                   | R <sup>2</sup>   | 1                     | 0.996                 | 0.873                 |

**Table S3.** Langmuir and Freundlich Adsorption Isotherms Parameters

|                       | T<br>(K) | Langmuir |       |              |       |       |          | Freundlich |       |       |       |          |
|-----------------------|----------|----------|-------|--------------|-------|-------|----------|------------|-------|-------|-------|----------|
|                       |          | $q_m$    | $K_L$ | $R_L$        | $R^2$ | RMSE  | $\chi^2$ | $K_F$      | $n$   | $R^2$ | RMSE  | $\chi^2$ |
| Pb <sup>2+</sup>      | 298      | 662.37   | 0.013 | 0.43~0.03    | 0.74  | 90.7  | 104.72   | 157.54     | 0.2   | 0.95  | 37.58 | 43.4     |
|                       | 308      | 533.81   | 0.046 | 0.18~0.0086  | 0.86  | 57.54 | 66.44    | 125.26     | 0.21  | 0.98  | 22.59 | 26.08    |
|                       | 318      | 567.80   | 0.24  | 0.041~0.0017 | 0.95  | 36.48 | 42.11    | 241.37     | 0.13  | 0.7   | 85.77 | 99.04    |
| Cu <sup>2+</sup><br>+ | 298      | 128.05   | 0.2   | 0.14~0.00816 | 0.95  | 7.61  | 8.78     | 44.082     | 0.20  | 0.88  | 12.02 | 13.88    |
|                       | 308      | 119.73   | 0.16  | 0.201~0.0124 | 0.92  | 9.47  | 10.92    | 40.044     | 0.2   | 0.97  | 6.041 | 6.98     |
|                       | 318      | 105.72   | 0.16  | 0.2~0.012    | 0.904 | 8.6   | 9.93     | 35.684     | 0.20  | 0.96  | 5.59  | 6.57     |
| Cd <sup>2+</sup><br>+ | 298      | 128.04   | 0.2   | 0.17~0.0098  | 0.962 | 7.61  | 8.78     | 44.082     | 0.034 | 0.88  | 12.02 | 13.86    |
|                       | 308      | 119.73   | 0.16  | 0.2~0.012    | 0.986 | 9.46  | 10.91    | 40.044     | 0.019 | 0.97  | 6.041 | 6.93     |
|                       | 318      | 105.72   | 0.16  | 0.2~0.012    | 0.985 | 3.04  | 9.9      | 35.684     | 0.021 | 0.96  | 5.69  | 6.56     |

**Table S4.** Dubinin-Radushkevich and Redlich-Peterson Adsorption Isotherms Parameters

|                       | T<br>(K) | Dubinin-Radushkevich  |                                      |                         |       |        |          | Redlich-Peterson |                                                            |      |       |       |          |
|-----------------------|----------|-----------------------|--------------------------------------|-------------------------|-------|--------|----------|------------------|------------------------------------------------------------|------|-------|-------|----------|
|                       |          | $q_{DR}$              | $K_{DR}$                             | $E$                     | $R^2$ | RMSE   | $\chi^2$ | $K_{RP}$         | $a_{RP}$                                                   | $g$  | $R^2$ | RMSE  | $\chi^2$ |
|                       |          | (mg·g <sup>-1</sup> ) | (mol <sup>2</sup> /kJ <sup>2</sup> ) | (kJ·mol <sup>-1</sup> ) |       |        |          |                  | (mg·L <sup>-1</sup> ) <sup>-<math>\frac{1}{g}</math></sup> |      |       |       |          |
| Pb <sup>2+</sup>      | 298      | 604.77                | 8.92×10 <sup>-2</sup>                | 23.67                   | 0.63  | 122.51 | 106.1    | 733.18           | 4.23                                                       | 0.82 | 0.99  | 9.85  | 12.45    |
|                       | 308      | 544.94                | 1.27×10 <sup>-3</sup>                | 19.87                   | 0.58  | 114.77 | 99.39    | 106.11           | 0.63                                                       | 0.83 | 0.99  | 38.93 | 46.71    |
|                       | 318      | 550.52                | 1.31×10 <sup>-6</sup>                | 618.38                  | 0.87  | 31.84  | 27.57    | 122.75           | 0.19                                                       | 1.02 | 0.94  | 35.28 | 44.63    |
| Cu <sup>2+</sup><br>+ | 298      | 117.95                | 9.73×10 <sup>-7</sup>                | 716.78                  | 0.89  | 14.6   | 12.64    | 35.76            | 0.41                                                       | 0.93 | 0.97  | 5.62  | 7.12     |
|                       | 308      | 109.78                | 1.79×10 <sup>-6</sup>                | 527.95                  | 0.79  | 18.56  | 16.07    | 75.83            | 1.39                                                       | 0.85 | 0.99  | 2.34  | 2.97     |
|                       | 318      | 98.26                 | 2.67×10 <sup>-6</sup>                | 433.07                  | 0.78  | 16.4   | 14.21    | 59.87            | 1.22                                                       | 0.86 | 0.99  | 3.085 | 3.9      |
| Cd <sup>2+</sup><br>+ | 298      | 124.48                | 2.04×10 <sup>-4</sup>                | 49.56                   | 0.91  | 13.95  | 12.09    | 1.68             | 0.0046                                                     | 1.13 | 0.96  | 7.06  | 9.62     |
|                       | 308      | 110.49                | 3.02×10 <sup>-4</sup>                | 40.68                   | 0.84  | 14.52  | 12.58    | 1.38             | 0.0062                                                     | 1.05 | 0.98  | 4.09  | 5.18     |
|                       | 318      | 114                   | 4.57×10 <sup>-4</sup>                | 33.07                   | 0.9   | 12.83  | 11.11    | 1.07             | 0.0013                                                     | 1.27 | 0.99  | 3.56  | 4.5      |
